# Supplementary material for: Study of the thermal decomposition mechanism of FOX-7 by molecular dynamics simulation and online photoionization mass spectrometry
Source: Royal Society of Chemistry journal article supplement (doi:10.1039/d0ra03443f), 2020-01-01
Supplement: d0ra03443f1.pdf [file d0ra03443f1.pdf]

Electronic Supplementary Material (ESI) for RSC Advances

**Study of Thermal Decomposition Mechanism of FOX-7 by Molecular Reaction Dynamics Simulation and Online Photoionization Mass Spectrometry**

Liping Jiang,<sup>a</sup> Xiaolong Fu,<sup>\*a</sup> Zhongyue Zhou,<sup>b</sup> Chongmin Zhang,<sup>a</sup> Jizhen Li,<sup>a</sup> Fei Qi,<sup>b</sup> Xuezhong Fan,<sup>a</sup> Guofang Zhang<sup>c</sup>

<sup>a</sup>*Xi'an Modern Chemistry Research Institute, Xi'an, 710065, PR China. E-mail: fuxiaolong204@163.com*

<sup>b</sup>*Key Laboratory for Power Machinery and Engineering of Ministry of Education (MOE), Shanghai Jiao Tong University, Shanghai, 200240, PR China*

<sup>c</sup>*Key Laboratory of Applied Surface and Colloid Chemistry, MOE/School of Chemistry and Chemical Engineering, Shaanxi Normal University, Xi'an 710062, PR China*

**1. unimolecular decomposition pathway snapshots of FOX-7 at 2500K**

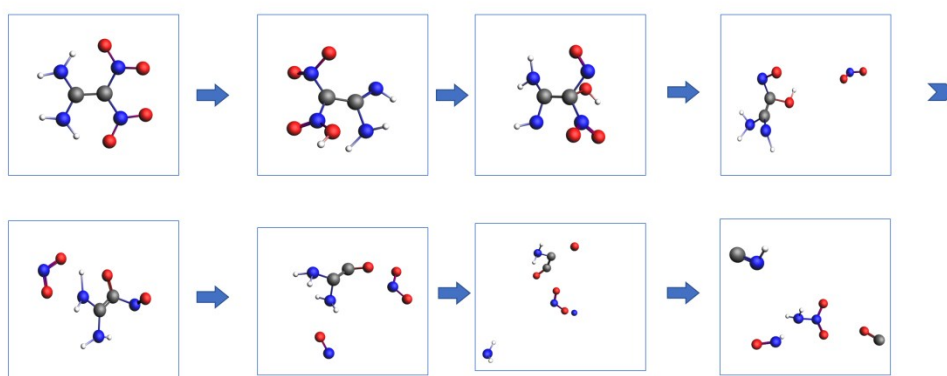

Fig. S1. unimolecular decomposition pathway snapshots of FOX-7 at 2500K (C, H, O, N atoms are represented by gray white, red and blue, respectively).
